# Supplementary material for: Mechanistic and biological characterisation of novel N5-substituted paullones targeting the biosynthesis of trypanothione in Leishmania
Source: PubMed Central journal article supplement — J Enzyme Inhib Med Chem. 2020 Jun 26;35(1):1345–58. doi: 10.1080/14756366.2020.1780227 (PMC7717452; doi:10.1080/14756366.2020.1780227), 2020-06-26
Supplement: IENZ_A_1780227_SM5350.pdf [file IENZ_A_1780227_SM5350.pdf]

Supplementary Table 1. Inhibition of trypanothione synthetase (TryS) by *N*<sup>5</sup>-substituted, 3-chlorokenpaullones.

| <i>N</i> <sup>6</sup> -linker chain                                                     | Compound             | <i>N</i> <sup>5</sup> -substitution                                                                 | % TryS inhibition at 30 μM <sup>a</sup> or IC <sub>50</sub> value (μM) <sup>b,c</sup> |                |
|-----------------------------------------------------------------------------------------|----------------------|-----------------------------------------------------------------------------------------------------|---------------------------------------------------------------------------------------|----------------|
|                                                                                         |                      |                                                                                                     | <i>Tc</i> TryS                                                                        | <i>Tb</i> TryS |
| none                                                                                    | 1                    | H                                                                                                   | NA                                                                                    | NA             |
|                                                                                         | 2                    | CH <sub>2</sub> CH <sub>2</sub> OH                                                                  | NA                                                                                    | NA             |
|                                                                                         | 3                    | R <sub>1</sub> = H                                                                                  | ~ <b>30</b>                                                                           | NA             |
| CH <sub>2</sub> CO-OR <sub>1</sub>                                                      | 4                    | R <sub>1</sub> = CH <sub>3</sub>                                                                    | 37.4 ± 2.6                                                                            | 17.1 ± 4.0     |
|                                                                                         | 5                    | R <sub>1</sub> = CH <sub>2</sub> CH <sub>3</sub>                                                    | 19.1 ± 5.5                                                                            | 29.8 ± 5.5     |
|                                                                                         | 6                    | R <sub>1</sub> = <i>tert</i> -butyl                                                                 | 10.3 ± 5.8                                                                            | NA             |
|                                                                                         | 7                    | R <sub>1</sub> = H, R <sub>2</sub> = H                                                              | 5.2 ± 1.2                                                                             | 14.5 ± 5.5     |
| CH <sub>2</sub> CO-NR <sub>1</sub> ,R <sub>2</sub>                                      | 8                    | R <sub>1</sub> = H, R <sub>2</sub> = NH <sub>2</sub>                                                | 10.1 ± 3.1                                                                            | 8.3 ± 5.8      |
|                                                                                         | 9                    | R <sub>1</sub> = H, R <sub>2</sub> = CH <sub>3</sub>                                                | 22.8 ± 2.3                                                                            | 44.4 ± 3.6     |
|                                                                                         | 10                   | R <sub>1</sub> = CH <sub>3</sub> , R <sub>2</sub> = CH <sub>3</sub>                                 | 14.9 ± 6.5                                                                            | 24.6 ± 3.8     |
|                                                                                         | 11                   | R <sub>1</sub> = H, R <sub>2</sub> = CH <sub>2</sub> CH <sub>3</sub>                                | 41.4 ± 8.3                                                                            | NA             |
|                                                                                         | 12                   | R <sub>1</sub> = CH <sub>2</sub> CH <sub>3</sub> , R <sub>2</sub> = CH <sub>2</sub> CH <sub>3</sub> | 7.8 ± 2.6                                                                             | ~ <b>30</b>    |
|                                                                                         | 13                   | R <sub>1</sub> = H, R <sub>2</sub> = (CH <sub>2</sub> ) <sub>2</sub> OH                             | NA                                                                                    | NA             |
|                                                                                         | 14                   | R <sub>1</sub> = H, R <sub>2</sub> = C-(CH <sub>2</sub> OH) <sub>3</sub>                            | NA                                                                                    | 12.6 ± 7.0     |
|                                                                                         | 15                   | R <sub>1</sub> = H, R <sub>2</sub> = <i>tert</i> -butyl                                             | 5.8 ± 3.3                                                                             | 10.9 ± 6.8     |
|                                                                                         | 16                   | R <sub>1</sub> = H, R <sub>2</sub> = 1,3,4-thiadiazol-2-yl                                          | ~ <b>30</b>                                                                           | 18.8 ± 3.3     |
|                                                                                         | 17                   | R <sub>1</sub> = H, R <sub>2</sub> = 4,5-dihydro-1,3-thiazol-2-yl                                   | 16 ± 2.2                                                                              | 41.3 ± 5.6     |
|                                                                                         | 18                   | R <sub>1</sub> = H, R <sub>2</sub> = 1,3-oxazol-2-yl                                                | 6.9 ± 3.9                                                                             | 12.2 ± 6.5     |
|                                                                                         | 19                   | R <sub>1</sub> = H, R <sub>2</sub> = phenyl                                                         | 29.6 ± 2.5                                                                            | ~ <b>30</b>    |
| CH <sub>2</sub> CO-R <sub>1</sub>                                                       | 20                   | R <sub>1</sub> = piperazin-1-yl, hydrochloride                                                      | 17.1 ± 4.9                                                                            | ~ <b>30</b>    |
|                                                                                         | 21                   | R <sub>1</sub> = 4-methylpiperazin-1-yl                                                             | NA                                                                                    | 31.6 ± 6.0     |
|                                                                                         | 22                   | R <sub>1</sub> = 4-BOC-piperazin-1-yl                                                               | NA                                                                                    | 18.7 ± 1.9     |
|                                                                                         | 23                   | R <sub>1</sub> = 4-(pyrimidin-2-yl)piperazin-1-yl                                                   | 40.6 ± 3.7                                                                            | 27.3 ± 3.9     |
|                                                                                         | 24                   | R <sub>1</sub> = piperidin-1-yl                                                                     | 7.1 ± 4.5                                                                             | 19.9 ± 2.5     |
|                                                                                         | 25                   | R <sub>1</sub> = pyrrolidin-1-yl                                                                    | NA                                                                                    | 9.8 ± 2.8      |
|                                                                                         | 26                   | R <sub>1</sub> = morpholin-4-yl                                                                     | NA                                                                                    | NA             |
| CH <sub>2</sub> CO-NH-CH <sub>2</sub> -CH <sub>2</sub> -NR <sub>1</sub> ,R <sub>2</sub> | Mol2008 <sup>d</sup> | R <sub>1</sub> = H, R <sub>2</sub> = CH <sub>3</sub>                                                | 40.5 ± 5.9                                                                            | 59.0 ± 6.0     |
|                                                                                         | 27                   | R <sub>1</sub> = H, R <sub>2</sub> = H, hydrochloride                                               | 26.3 ± 3.6                                                                            | 27.3 ± 5.9     |
|                                                                                         | 28                   | R <sub>1</sub> = CH <sub>2</sub> CH <sub>3</sub> , R <sub>2</sub> = CH <sub>2</sub> CH <sub>3</sub> | 17.1 ± 1.1                                                                            | 16.0 ± 5.6     |
|                                                                                         | 29                   | R <sub>1</sub> = H, R <sub>2</sub> = BOC                                                            | 38.5 ± 4.5                                                                            | 28.3 ± 3.2     |
| CH <sub>2</sub> CO-NH-CH <sub>2</sub> -CH <sub>2</sub> -R <sub>1</sub>                  | 30                   | R <sub>1</sub> = morpholin-4-yl                                                                     | 11.3 ± 5.1                                                                            | 6.1 ± 4.9      |
|                                                                                         | 31                   | R <sub>1</sub> = piperidin-1-yl                                                                     | 21.4 ± 0.0                                                                            | 20.5 ± 3.2     |
|                                                                                         | 32                   | R <sub>1</sub> = piperazin-1-yl, dihydrochloride                                                    | 7.9 ± 8.4                                                                             | NA             |
|                                                                                         | 33                   | R <sub>1</sub> = 4-methylpiperazin-1-yl                                                             | 16.8 ± 5.7                                                                            | 8.1 ± 6.2      |
|                                                                                         | 34                   | R <sub>1</sub> = 4-BOC-piperazin-1-yl                                                               | <b>20 ± 3</b>                                                                         | 24.8 ± 3.6     |
| CH <sub>2</sub> CO-NH(CH <sub>2</sub> ) <sub>4</sub> -NH-R <sub>1</sub>                 | 35                   | R <sub>1</sub> = H, hydrochloride                                                                   | 6.7 ± 8.8                                                                             | 10.8 ± 2.2     |
|                                                                                         | 36                   | R <sub>1</sub> = BOC                                                                                | <b>25 ± 3</b>                                                                         | 27.9 ± 4.6     |

<sup>a</sup> Enzyme inhibition is expressed as % TryS inhibition ± 2σ<sup>n-1</sup>. <sup>b</sup> IC<sub>50</sub> values with their corresponding standard deviation (± 2σ<sup>n-1</sup>) are highlighted in bold italics. <sup>c</sup> For compounds inhibiting TryS by 50 ± 5% at 30 μM, an IC<sub>50</sub> of ~ **30** μM is assumed. <sup>d</sup> Data published in <sup>20</sup>. NA, not active (enzyme activity at 30 μM is > 95%). BOC, refers to a *tert*-butyloxycarbonyl group.

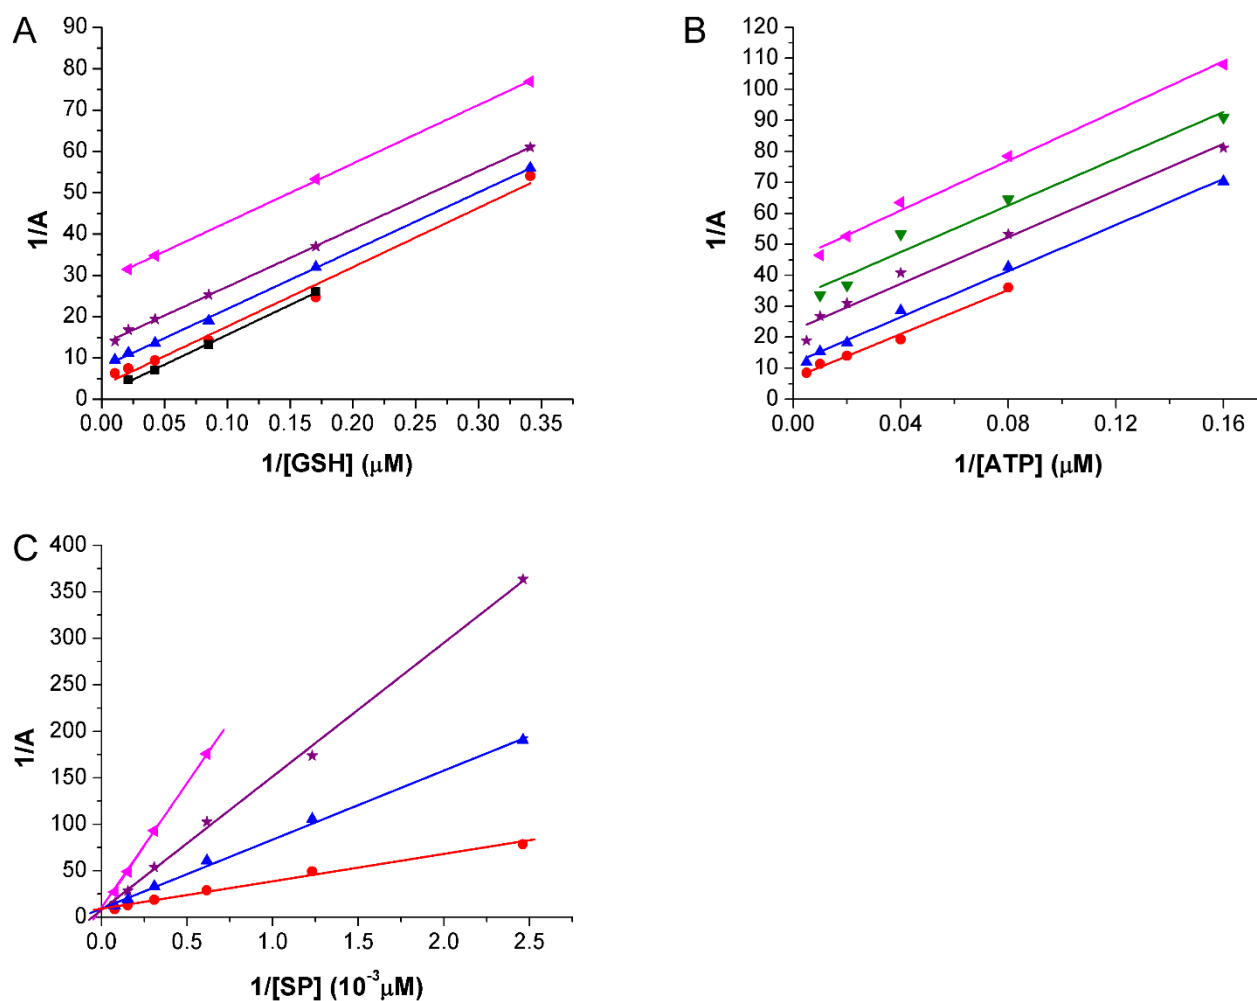

**Figure S1. Mode of *L*/TryS inhibition by compound 20.** Lineweaver-Burk reciprocal plots for the *L*/TryS activity measured at different inhibitor (black square: 0  $\mu\text{M}$ , red circle: 0.31  $\mu\text{M}$ , blue triangle: 0.775  $\mu\text{M}$ , violet star: 1.55  $\mu\text{M}$ , green inverted triangle: 2.3  $\mu\text{M}$  and magenta inclined triangle: 3.1  $\mu\text{M}$ ) and varying substrate concentrations while maintaining fixed the concentration of the co-substrates. The maximum concentration of SP and ATP used in these studies that do not interfere with the colorimetric assay were 13 mM ( $\sim 9.1$ -fold the  $K_M$  value) and 200  $\mu\text{M}$  ( $\sim 4.6$ -fold the  $K_M$  value), respectively. For GSH, the maximum concentration tested was 100  $\mu\text{M}$  because at higher values there is a marked enzyme inhibition and loss of linearity. The enzyme velocities were measured using the end-point assay based on BIOMOL GREEN™ reagent (Enzo Life Sciences) and the reciprocal plots are shown for the varying substrate: **A**) GSH, **B**) ATP, **C**) SP.
